# Supplementary material
Source: PubMed Central journal article supplement (PMC1681468)

# Epidermal Growth Factor Receptor Pathway Map

(EGFR0504V2)

Kanae Oda (1,2), Yukiko Matsuoka (3), Hiroaki Kitano (1,2,4)

(1) The Systems Biology Institute, (2) Department of Fundamental Science and Technology, Keio University, (3) ERATO-SORST Kitano Symbiotic Systems Project, Japan Science and Technology Agency, (4) Sony Computer Science Laboratories, Inc.

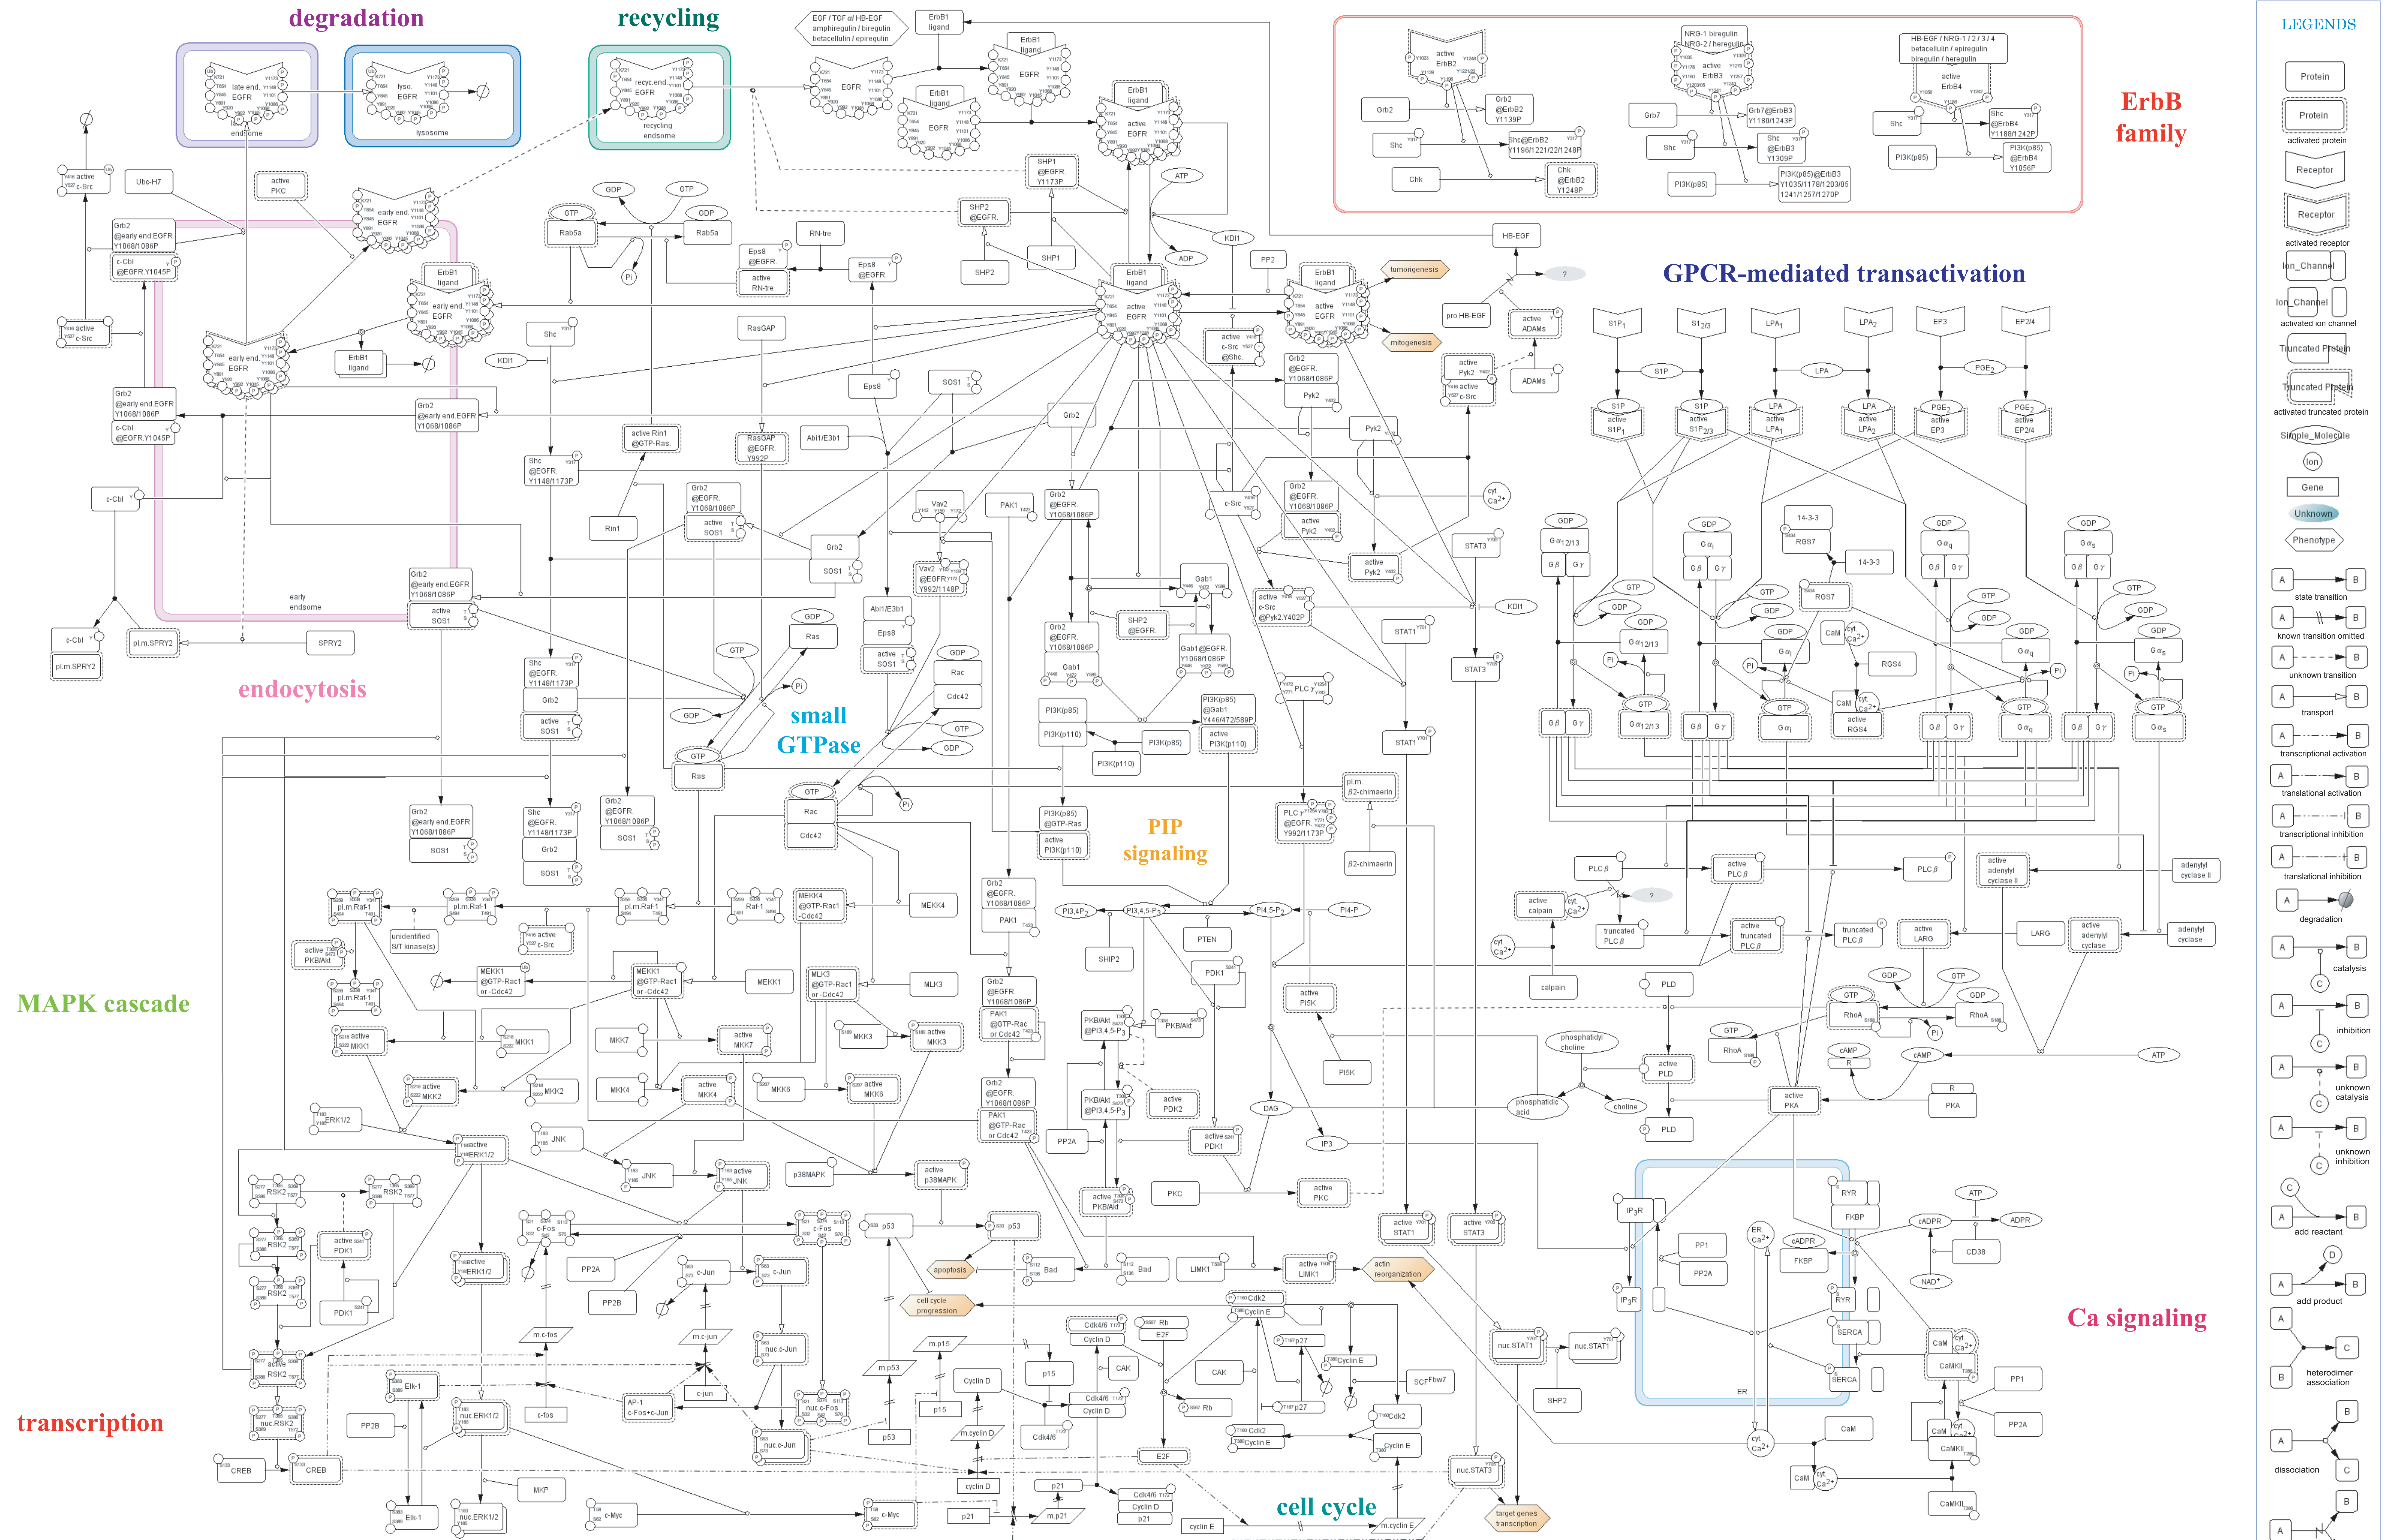

## LEGENDS

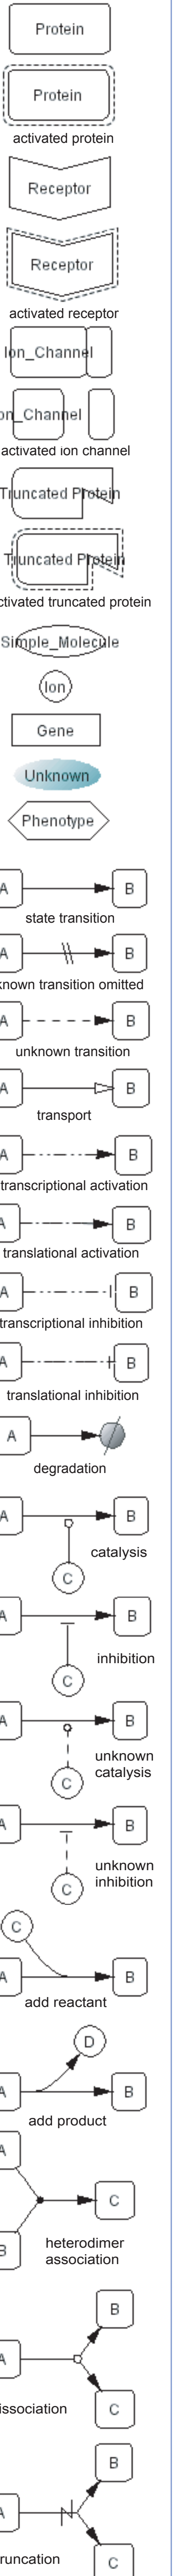

Supplement: msb4100014-s1.pdf [file msb4100014-s1.pdf]
