# Supplementary material
Source: PubMed Central journal article supplement (PMC1681468)

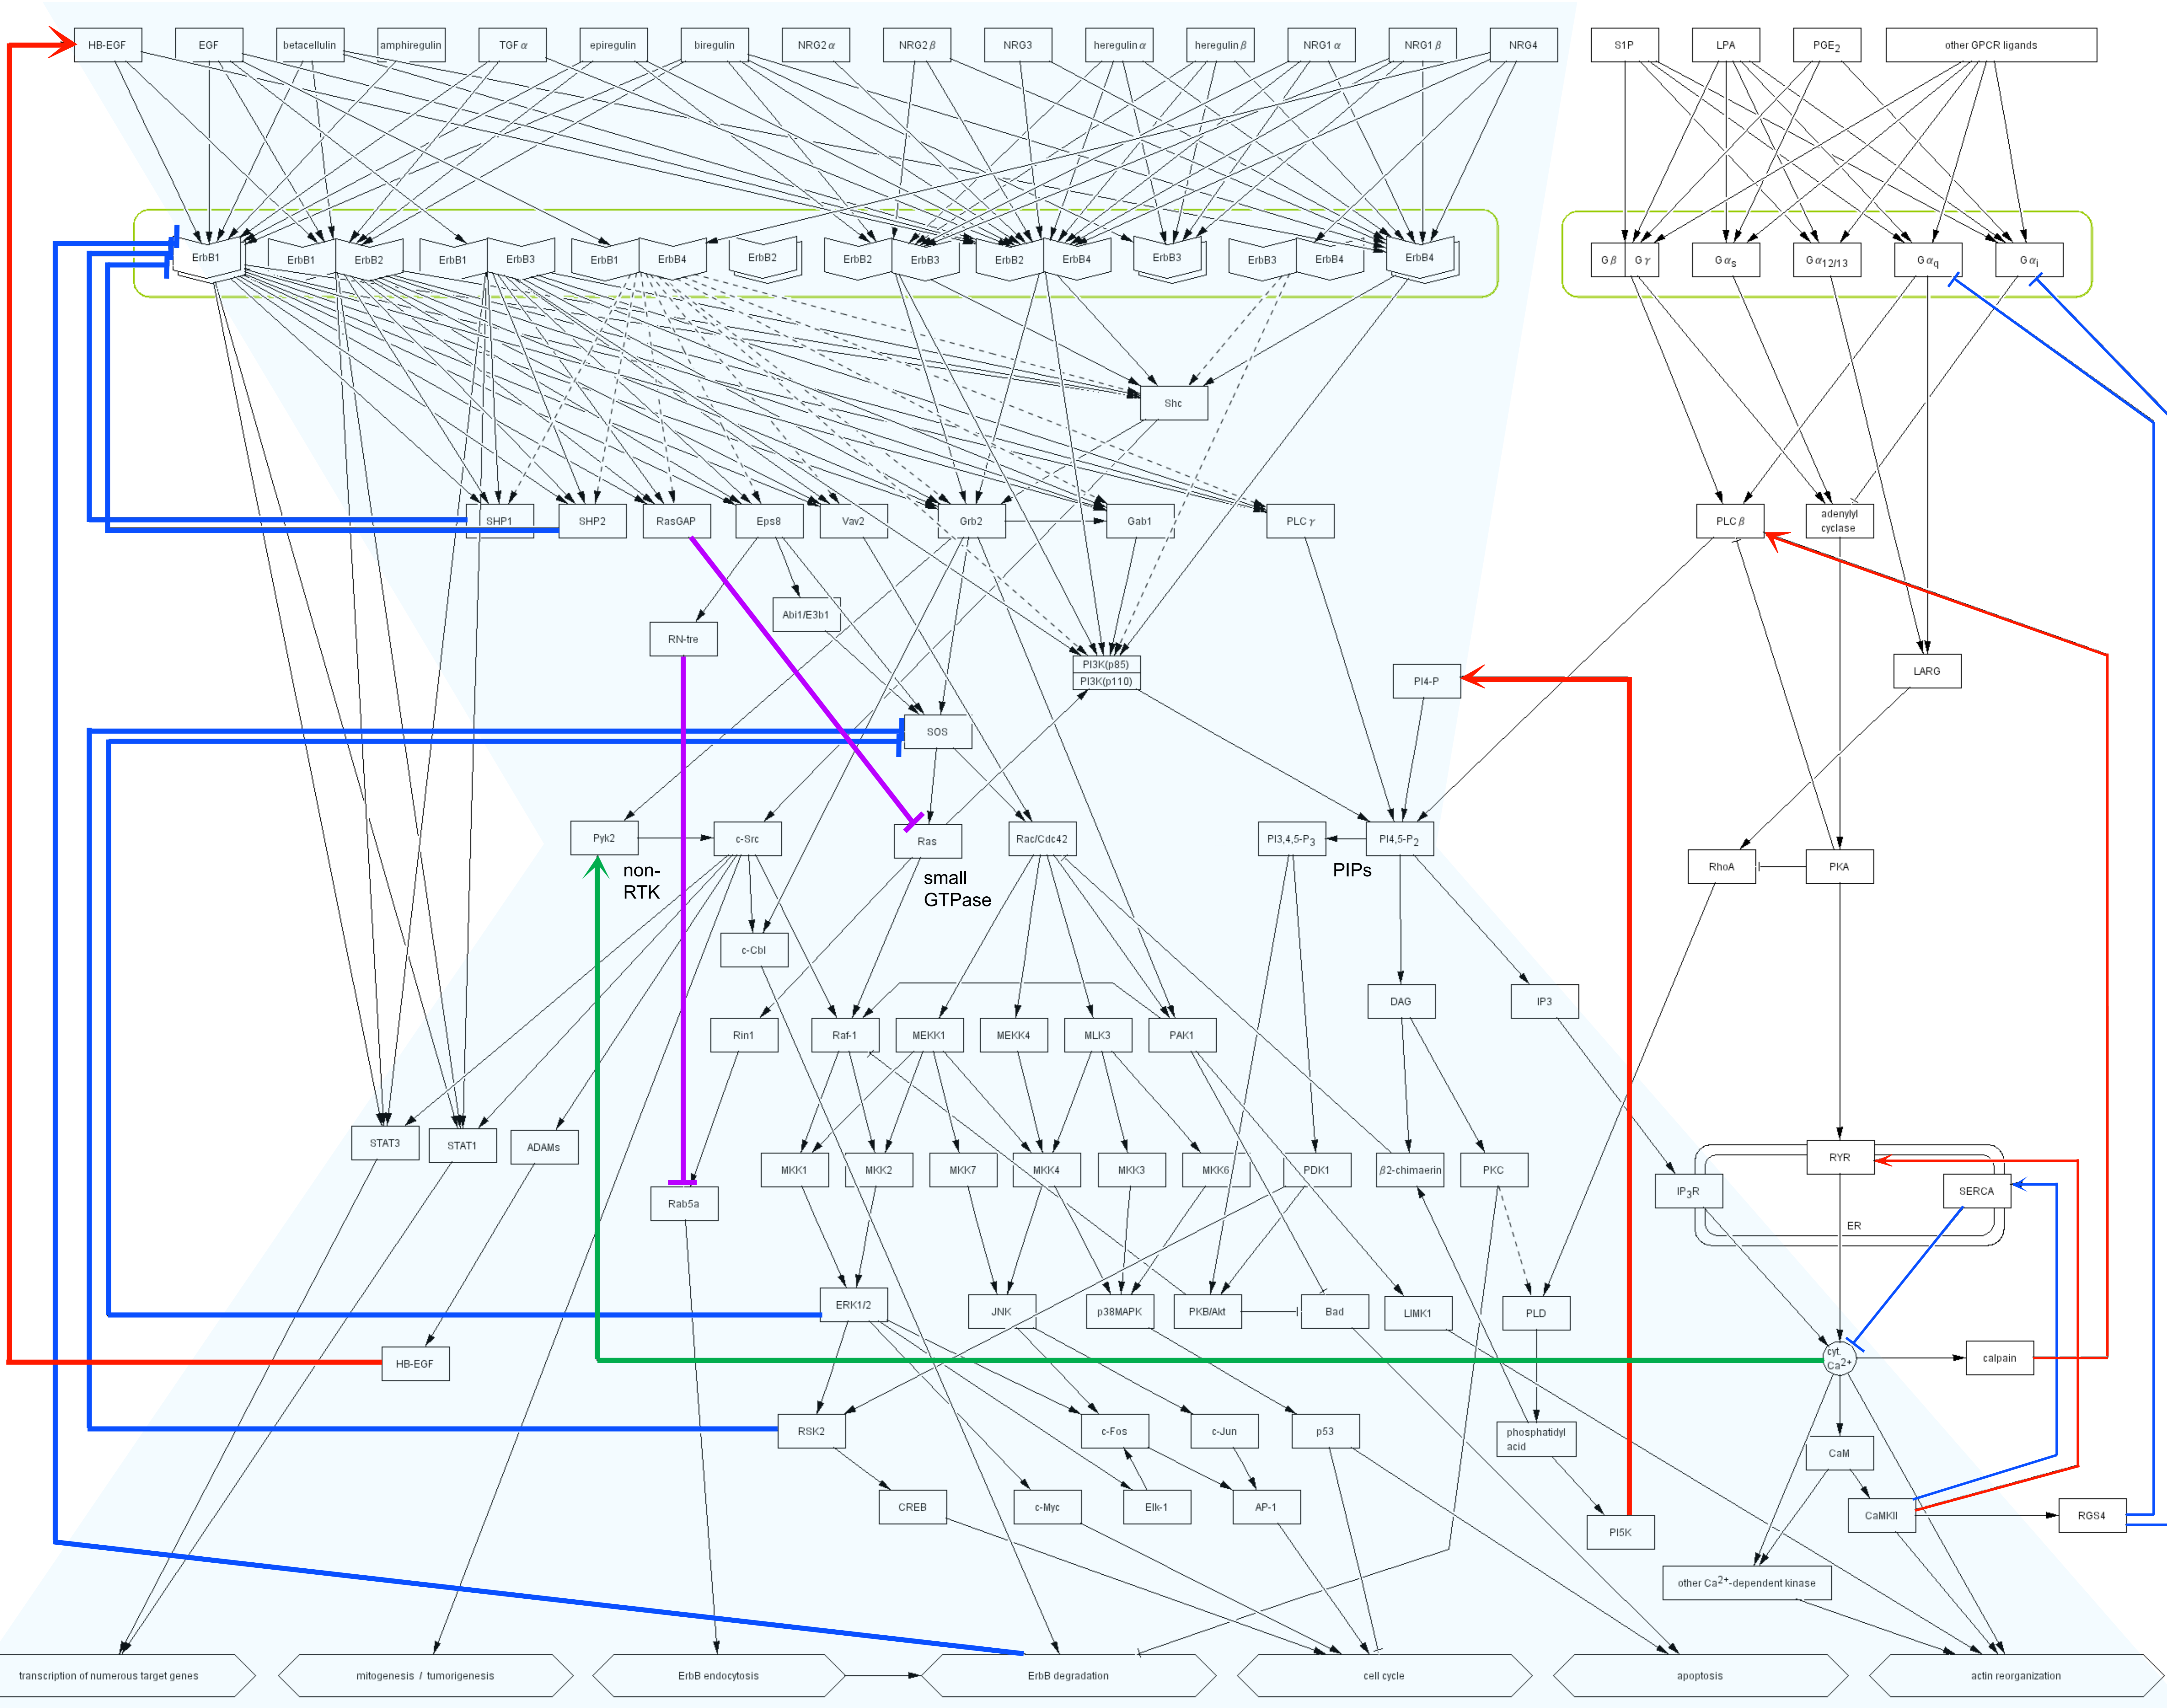

Supplement: msb4100014-s2.pdf [file msb4100014-s2.pdf]
